# Supplementary material for: A Method to Estimate the Efficacy vs. Effectiveness in Meta-Analysis of Clinical Trials with Different Adherence Scenarios: A Monte Carlo Simulation Study in Nutrition
Source: MDPI journal article supplement (doi:10.3390/nu13072352), 2021-07-09
Supplement: s1 [file s1]

**Computer Code S1: Commands to deduce analysis per protocol with data known by intention to treat.**

```
###
##
# COCHRANE STUDY OF FV AND CARDIOVASCULAR DISEASE MARKERS
##
###

## ----- PAS -----

# Data frame with primary studies

ds <- data.frame(
  id=c(1,2), ## ID study
  m.i=c(-2, -1.6), ## arithmetic mean of SBP in the intervention group
  m.c=c(1.4, -.6), ## arithmetic mean of SBP in the control group
  s.i=c(13.5, 16.4), ## standard deviation in the intervention group
  s.c=c(14.6, 17.6), ## standard deviation in the control group
  n.i=c(344, 100), ## sample size in the intervention group
  n.c=c(346, 101) ## sample size in the control group
)

ds
library(metafor)

met1 <- escalc(measure = "MD", m1i=m.i, sd1i=s.i, n1i=n.i, m2i=m.c,
sd2i=s.c, n2i=n.c, data=ds)
met1
meta.rma1 <- rma(yi,vi, method = "REML", data=met1)
meta.rma1

## ----- COMMANDS TO DEDUCT SIMULATIONS of PER PROTOCOL STATISTICS -----
----

set.seed(12345)

s <- 1000

dm <- data.frame(sim=c(1:s))

for(x in 1:s){ ## Loop through the 1000 simulations

  # simulate adherence in each study

  ds$p.i <- rbeta(nrow(ds), 70, 30) # In the intervention group pi=0.70
(values are changed for each planned scenario)

  ds$p.c <- rbeta(nrow(ds), 10, 90) # In the control group pc=0.30
(values are changed for each planned scenario)
```

```

## Estimation of the means and variances of effect in those who truly
take FV and those who do not

## In each study separately

for(r in 1:nrow(ds)){

# Data observed in allocation groups: intervention (i) and control(c)

  MO <- c(ds$m.i[r], ds$m.c[r])      # Medias
  VO <- c(ds$s.i[r]^2, ds$s.c[r]^2)  # Varianzas
  NO <- c(ds$n.i[r], ds$n.c[r])      # muestra

# Adherence probability matrix
  PM <- matrix(c(ds$p.i[r], ds$p.c[r], 1-ds$p.i[r], 1-ds$p.c[r]),
nrow=2)

# Estimated data in the real fruit groups: In those who take (1) and do
not take (0)
  MT <- solve(PM, MO)                # mean
  ST <- (solve(PM, VO + MO^2))        # Variances (intermediate step)
  VT=ST-MT^2                          # Variances
  NT <- t(PM) %*% NO                 # sample sizes

# Put the results in the database
  ds$m.1[r] <- MT[1] # mean in those who truly take FV
  ds$m.0[r] <- MT[2] # mean in which they do not really eat FV
  ds$s.1[r] <- sqrt(VT[1]) # standard deviation in those who truly eat
fruit
  ds$s.0[r] <- sqrt(VT[2]) # standard deviation in which they do not
really eat FV
  ds$n.1[r] <- round(NT[1]) # sample size of those who truly eat FV
  ds$n.0[r] <- round(NT[2]) # sample size of those who
truly do not eat FV
}
ds

## Obtain 1000 meta-analyzes with data per protocol

  met2<-escalc(measure = "MD", mli=m.1, sdli=s.1, nli=n.1, m2i=m.0,
sd2i=s.0, n2i=n.0, data=ds)

  meta.rma2<-rma(yi,vi, method="REML", data=met2) # calculates meta-
analysis with declared intake

# extract the data from the 1000 simulations with pi=0.70 and pc=0.30

  dm[x, "media_70_10"]<- meta.rma2$beta
  dm[x, "se_70_10"]<-meta.rma2$se
  dm[x, "p-valor_70_10"]<- meta.rma2$pval
  dm[x, "inf_70_10"]<- meta.rma2$ci.lb
  dm[x, "sup_70_10"]<- meta.rma2$ci.ub
  dm[x, "n_1_70_10"]<- sum(n_1)
  dm[x, "n_0_70_10"]<- sum(n_0)
  dm[x, "i2_70_10"]<- meta.rma2$I2
}

```

```
PAS_70_30_REML<-data.frame(dm) ## The database is generated with  
simulations per protocol for the scenario  $\pi_i = 0.70$  and  $\pi_c = 0.30$ . The  
process is repeated for the remaining 11 adherence scenarios.
```
